# Supplementary material for: Aryl Hydrocarbon Receptor Inhibition Restores Indoxyl Sulfate-Mediated Endothelial Dysfunction in Rat Aortic Rings
Source: MDPI journal article supplement (doi:10.3390/toxins14020100), 2022-01-26
Supplement: s1 [file s1]

# Supplementary Materials: Aryl Hydrocarbon Receptor Inhibition Restores Indoxyl Sulfate-Mediated Endothelial Dysfunction in Rat Aortic Rings

Cindy Nguyen, Amanda J. Edgley, Darren J. Kelly and Andrew R. Kompa

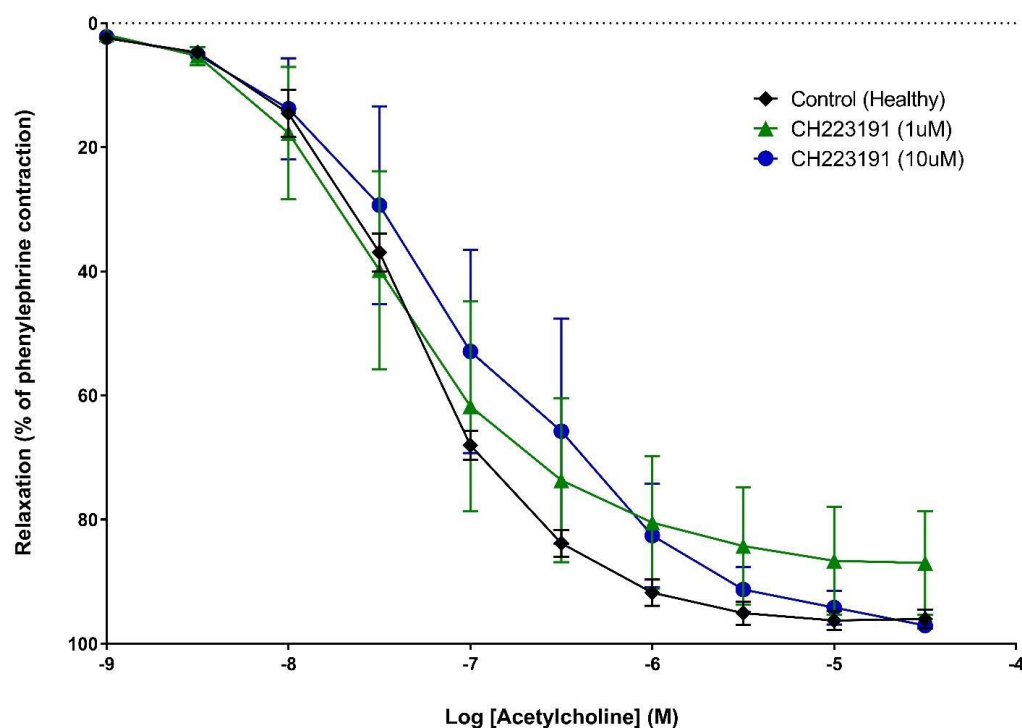

**Figure S1.** Effect of CH223191 alone on vascular reactivity in isolated rat aortic rings. Dose-response curves to acetylcholine were unaffected in the presence of CH223191 (1 and 10  $\mu$ M) alone compared to control.

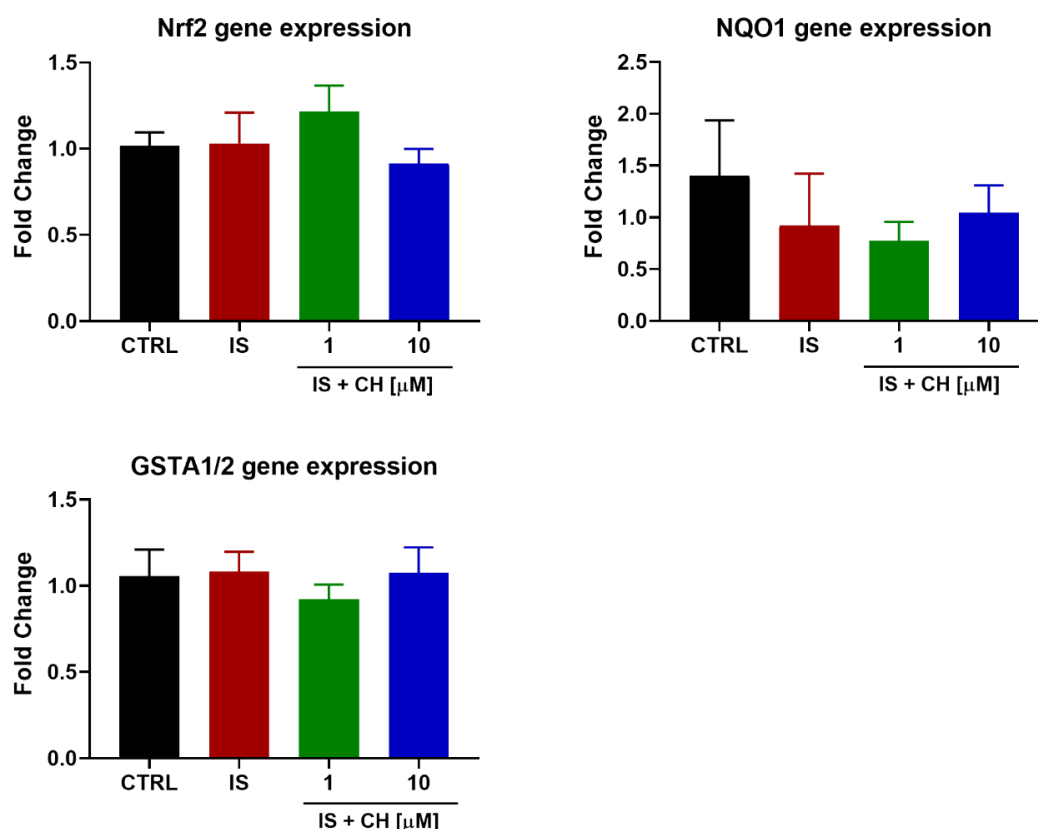

**Figure S2.** Effect of IS and AhR inhibition on Nrf2 and antioxidant gene expression. Exposure of aortic rings to IS in the absence and presence of CH223191 did not affect gene expression Nrf2, NQO1 and GSTA1/2. Data expressed as mean  $\pm$  SEM from N=6 experiments.

**Table S1.** Nucleotide sequences of primers used for gene quantification by real time PCR.

| Gene of Interest             | Primer Sequence (5'-3')           |
|------------------------------|-----------------------------------|
| Rat 18S (House-keeping gene) | Forward: TCGAGGCCCTGTAATTGGAA     |
|                              | Reverse: CCCTCCAATGGATCCTCGTT     |
| Rat CYP1A1                   | Forward: CCACAGCACCATAAGAGATACAAG |
|                              | Reverse: CCGGAAGTCTGTTGGATCAC     |
| Rat GSTA1/2                  | Forward: GGAGATTGATGGGATGAAGC     |
|                              | Reverse: AACACCTTTTCAAAGGCAGG     |
| Rat Nrf2                     | Forward: CTCCCAGGTTGCCCACATTC     |
|                              | Reverse: CCTGCCAAACTTGCTCCATG     |
| Rat NQO1                     | Forward: GACATGAACGTCATTCTCTG     |
|                              | Reverse: CTAGCTTTGATCTGGTTGTC     |
| Rat TNF $\alpha$             | Forward: GTGATCGGTCCCAACAAGGA     |
|                              | Reverse: CGCTTGGTGGTTTGCTACG      |
| Rat VCAM-1                   | Forward: ACAAACGCTCGCTCAGATT      |
|                              | Reverse: GTCCATGGTCAGAACGGACT     |
